# Supplementary material for: Optimising Antibiotic Usage to Treat Bacterial Infections
Source: PubMed Central journal article supplement (PMC5124968; doi:10.1038/srep37853), 2016-11-28
Supplement: srep37853-s1.pdf [file srep37853-s1.pdf]

# Optimising Antibiotic Usage to Treat Bacterial Infections

Iona K. Paterson, Andy Hoyle, Gabriela Ochoa, Craig Baker-Austin,  
Nick G. H. Taylor

## Supplementary Table S1 - Results from 1% initial resistant population

**Table S1:** Comparison of traditional dosage vectors (runs A, B, C and D), dosage vectors produced by the GA with deterministic modelling (runs E, F, G and K) and dosage vectors produced by the GA with stochastic modelling (runs H, I and J) for an infection with a resistant population of 1% of the total bacterial population.

| Run | Dosage Vector                            | Total Antibiotic | Success Rate (%) [95% CI] |
|-----|------------------------------------------|------------------|---------------------------|
| A   | (21, 21, 21, 21, 21, 21, 21, 21, 21, 21) | 210 $\mu g/ml$   | 99.5 [99.3, 99.7]         |
| B   | (21, 21, 21, 21, 21, 21, 21, 21, 21, 0)  | 189 $\mu g/ml$   | 98.4 [98.0, 98.7]         |
| C   | (21, 21, 21, 21, 21, 21, 21, 21, 0, 0)   | 168 $\mu g/ml$   | 96.7 [96.2, 97.2]         |
| D   | (21, 21, 21, 21, 21, 21, 21, 0, 0, 0)    | 168 $\mu g/ml$   | 85.4 [84.4, 86.4]         |
| E   | (60, 22, 4, 0, 0, 0, 0, 0, 0, 0)         | 86 $\mu g/ml$    | 86.9 [85.9, 87.8]         |
| F   | (50, 23, 13, 0, 0, 0, 0, 0, 0, 0)        | 86 $\mu g/ml$    | 87.2 [86.2, 88.1]         |
| G   | (40, 30, 20, 10, 0, 0, 0, 0, 0, 0)       | 100 $\mu g/ml$   | 91.8 [91.0, 92.5]         |
| H   | (60, 21, 10, 10, 2, 0, 0, 0, 0, 0)       | 103 $\mu g/ml$   | 96.2 [95.6, 96.7]         |
| I   | (50, 27, 19, 4, 0, 0, 0, 0, 0, 0)        | 100 $\mu g/ml$   | 96.4 [95.8, 96.9]         |
| J   | (40, 32, 18, 19, 0, 0, 0, 0, 0, 0)       | 109 $\mu g/ml$   | 96.2 [95.6, 96.7]         |
| K   | (60, 22, 22, 21, 15, 14, 10, 4, 0, 0)    | 168 $\mu g/ml$   | 99.9 [99.8, 100.0]        |

## Supplementary Equations - Analytical Analysis of Antibiotic Free System

Using stability analysis the steady states of the system, in the absence of antibiotic, can be determined. At equilibrium,  $dS/dt = dR/dt = 0$ , there are four equilibrium points:

- 1) Extinction:  $(S, R) = (0, 0)$
- 2) Susceptible Only:  $(S, R) = (K(1 - \frac{\theta}{r}), 0)$
- 3) Resistant Only:  $(S, R) = (0, K(1 - \frac{\theta}{r(1-a)}))$
- 4) Co-existence:  $(S, R) = (S^*, R^*)$  where

$$S^* = \frac{ar\theta + K\beta(ar - r + \theta)}{\beta(ar + K\beta)} \quad (1)$$

$$R^* = \frac{K\beta(r - \theta) - ar\theta}{\beta(ar + K\beta)} \quad (2)$$

Stability of the equilibrium points are found by calculating the Jacobian (Eq. 3) at each of the equilibria and calculating the corresponding eigenvalues.

$$J = \begin{pmatrix} r(1 - \frac{R+2S}{K}) - \beta R - \theta & -\frac{rS}{K} - \beta S \\ -\frac{rR(1-a)}{K} + \beta R & r(1 - \frac{S+2R}{K})(1-a) + \beta S - \theta \end{pmatrix} \quad (3)$$

- 1) At the extinction equilibrium,  $(0, 0)$ , the Jacobian is reduced to Eq. 4.

$$J = \begin{pmatrix} r - \theta & 0 \\ 0 & r(1-a) - \theta \end{pmatrix} \quad (4)$$

The Jacobian matrix (Eq. 4) is a diagonal matrix and therefore the eigenvalues can be found on the diagonal. The extinction equilibrium is stable when Eq. 5 and 6 are satisfied.

$$r < \theta \quad (5)$$

$$r(1-a) < \theta \quad (6)$$

When the natural death rate is higher than the replication rate, for both the susceptible and resistant strains, the system will tend to extinction.

- 2) When evaluated at the resistant free equilibrium  $(K(1 - \frac{\theta}{r}), 0)$ , the Jacobian is reduced to Eq. 7.

$$J = \begin{pmatrix} \theta - r & \theta - \beta K - r - \frac{\beta K \theta}{r} \\ 0 & \beta K(1 - \frac{\theta}{r}) - \theta a \end{pmatrix} \quad (7)$$

Eq. 7 is upper triangular and therefore the eigenvalues can be found on the diagonal. For the resistant free equilibrium to be stable it must satisfy Eq. 8 and 9.

$$\theta < r \quad (8)$$

$$\beta K \left(1 - \frac{\theta}{r}\right) < \theta a \quad (9)$$

The replication rate must be greater than the death rate otherwise the susceptible population would die out, therefore Eq. 8 must hold true. A lower transmission rate or a higher cost benefits the susceptible population.

3) Evaluating the stability at the susceptible free equilibrium  $(0, K(1 - \frac{\theta}{r(1-a)}))$ , the Jacobian is reduced to Eq. 10.

$$J = \begin{pmatrix} \frac{\theta}{(1-a)} - \beta K \left(1 - \frac{\theta}{r(1-a)}\right) - \theta & 0 \\ \theta - r(1-a) + \beta K \left(1 - \frac{\theta}{r(1-a)}\right) & \theta - r(1-a) \end{pmatrix} \quad (10)$$

Eq. 10 is lower triangular and the eigenvalues can be found on the diagonal. Therefore for the susceptible free equilibrium to be stable it must satisfy Eq. 11 and 12

$$\frac{\theta}{(1-a)} - \beta K \left(1 - \frac{\theta}{r(1-a)}\right) - \theta < 0 \quad (11)$$

$$\theta < r(1-a) \quad (12)$$

The net replication rate must be greater than the death rate otherwise the resistant population would die out, therefore Eq. 11 must hold true. A higher transmission rate or a lower cost benefits the resistant population making it possible for the resistance bacteria to invade and out-compete an entirely susceptible population.

4) Analysis of the stability of the co-existence equilibrium is not possible due to the eigenvalues being analytically intractable. If it is hypothesised that stable co-existence is possible then from the previous equilibrium points it can be concluded that co-existence will occur, assuming a positive net growth rate for both bacteria, if:

$$\beta K \left(1 - \frac{\theta}{r}\right) - \theta a > 0$$

and

$$\frac{\theta}{(1-a)} - \beta K \left(1 - \frac{\theta}{r(1-a)}\right) - \theta > 0$$

Using the analytical analysis parameter values were chosen such that they satisfy Eq. 8 and 9. Therefore the resistant strain would not out-compete the susceptible strain in the absence of antibiotics.

## Supplementary Figure S1 - Results from varied parameter values on success rate of regimens T3, S2 and S4

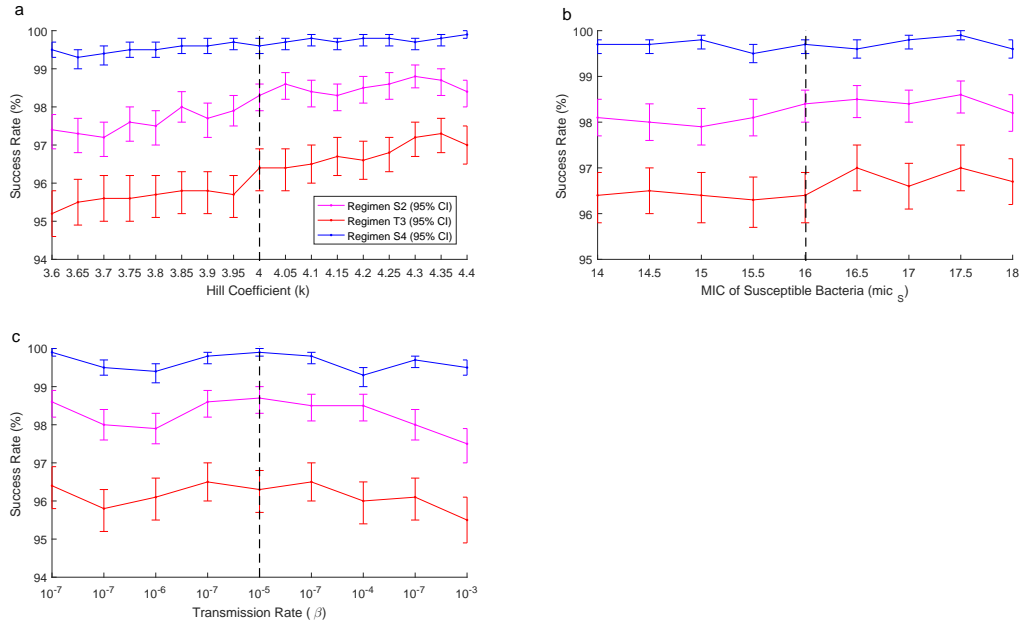

**Figure S1:** Success rates for regimens  $S_2$  (pink),  $T_3$  (red) and  $S_4$  (blue) at varying values for parameters (a)  $k$ , (b)  $mic_S$  and (c)  $\beta$ . Black dashed line shows original parameter values. (a) Increasing  $k$  results in an increase in success rate for all 3 regimens. The difference in success rate between the 3 regimens remains consistent. (b) Altering the MIC of the susceptible bacteria has little effect on the success rate of the 3 treatment regimens. (c) Increasing the transmission rate of the resistant bacteria begins to decrease the success rate. The difference in success rate between the 3 regimens remains consistent.

## Supplementary Table S2 - Results from varied weights within the objective function

**Table S2:** Comparison of dosage vectors produced by the GA with deterministic modelling, for varying values of  $w_1$  and  $w_2$ .

| $w_1$ | $w_2$ | Dosage Vector                       | Total Antibiotic | Success Rate (%) [95% CI] |
|-------|-------|-------------------------------------|------------------|---------------------------|
| 0.5   | 0.5   | (60, 22, 23, 13, 0, 0, 0, 0, 0, 0)  | 118 $\mu g/ml$   | 91.9 [91.1, 92.6]         |
|       |       | (60, 22, 22, 14, 11, 0, 0, 0, 0, 0) | 129 $\mu g/ml$   | 95.0 [94.4, 95.6]         |
| 0.99  | 0.01  | (60, 22, 21, 15, 0, 0, 0, 0, 0, 0)  | 118 $\mu g/ml$   | 92.3 [91.5, 93.0]         |
|       |       | (60, 22, 18, 17, 11, 0, 0, 0, 0, 0) | 128 $\mu g/ml$   | 93.9 [93.2, 94.6]         |
